# Supplementary material for: Telehealth Demand Trends During the COVID-19 Pandemic in the Top 50 Most Affected Countries: Infodemiological Evaluation
Source: PubMed Central journal article supplement (PMC7899203; doi:10.2196/24445), 2021-02-19
Supplement: publichealth_v7i2e24445_app1.pdf [file publichealth_v7i2e24445_app1.pdf]

|                     |                                                                                                    |                                                                          |                                             |
|---------------------|----------------------------------------------------------------------------------------------------|--------------------------------------------------------------------------|---------------------------------------------|
| <b>South Africa</b> | telemedisyne + Telehealth + Telemedicine + Telemedizin + Télémédecine + Telesalud + Telemedicina   | English + German + Spanish + Russian + French + Afrikaans + Zulu + Xhosa | English, Zulu, Xhosa, Afrikaans             |
| <b>Germany</b>      | Telehealth + Telemedicine + Telemedizin + Télémédecine + Telesalud + Телемедицина + Telemedicina   | English + German + Spanish + Russian + French + Italian                  | German                                      |
| <b>Bangladesh</b>   | Telehealth + Telemedicine + Telemedizin + Télémédecine + Telesalud + টেলিমেডিসিন + Telemedicina    | English + German + Spanish + French + Italian + Bangla                   | Bangla / Bengali, English                   |
| <b>France</b>       | Telehealth + Telemedicine + Télésanté + Télémédecine + Telesalud + telemedizin + Telemedicina      | English + German + Portugese + Spanish + French + italian                | French, English, Portugese, Italian, German |
| <b>Colombia</b>     | Telehealth + Telemedicine + Telemedizin + Télémédecine + Telesalud + Telessaúde + Telemedicina     | English + German + Portugese + Spanish + French + italian                | Spanish                                     |
| <b>Canada</b>       | Telehealth + Telemedicine + Télésanté + Télémédecine + Telesalud + telemedizin + Telemedicina      | English + German + Portugese + Spanish + French + italian                | English, French                             |
| <b>Qatar</b>        | Telehealth + Telemedicine + Telemedizin + Telesalud + Telemedicina + التطبيب عن بعد + الصحة عن بعد | English + German + Spanish + Arabic                                      | Arabic, English                             |
| <b>China</b>        | Telehealth + Telemedicine + 遠程醫療 + 远程医疗                                                            | English + Simplified and Traditional Chinese                             |                                             |
| <b>Argentina</b>    | Telehealth + Telemedicine + Telemedizin + Télémédecine + Telesalud + Телемедицина + Telemedicina   | English + German + Spanish + Russian + French + Italian                  | Spanish                                     |
| <b>Egypt</b>        | Telehealth + Telemedicine + Telemedizin + Telesalud + Telemedicina + التطبيب عن بعد + الصحة عن بعد | English + German + Spanish + Arabic                                      |                                             |
| <b>Sweden</b>       | Telehealth (topic)                                                                                 |                                                                          | English, Swedish, Finnish                   |
| <b>Indonesia</b>    | Telehealth + Telemedicine + Telemedizin + Télémédecine + Telesalud + Телемедицина + Telemedicina   | English + German + Spanish + Russian + French + Italian                  | Indonesian                                  |
| <b>Belarus</b>      | Telehealth (topic)                                                                                 |                                                                          | Belarusian, Russian                         |
| <b>Ecuador</b>      | Telehealth + Telemedicine + Telemedizin + Télémédecine + Telesalud + Telessaúde + Telemedicina     | English + German + Portugese + Spanish + French + italian                | Spanish                                     |
| <b>Iraq</b>         | Telehealth + Telemedicine + Telemedizin + Telesalud + Telemedicina + التطبيب عن بعد + الصحة عن بعد |                                                                          | Arabic, Kurdish                             |
| <b>Belgium</b>      | Telehealth + Telemedicine + Telegeneeskunde + Télémédecine + Телемедицина + telemedizin            | English + Dutch + French + German + russian                              | Dutch, German, French                       |

|                           |                                                                                                     |                                                                    |                                                                                 |
|---------------------------|-----------------------------------------------------------------------------------------------------|--------------------------------------------------------------------|---------------------------------------------------------------------------------|
|                           |                                                                                                     |                                                                    |                                                                                 |
| <b>UAE</b>                | Telehealth + Telemedicine + телемедицина + Telesalud + Telemedicina + التطبيب عن بعد + الصحة عن بعد | English + Russian + Spanish + Arabic                               | Arabic, English                                                                 |
| <b>Netherlands</b>        | Telehealth + Telemedicine + Telegeneeskunde + Télémédecine + Телемедицина + telemedizin             | English + Dutch + French + German + russian                        | Dutch                                                                           |
| <b>Kuwait</b>             | Telehealth + Telemedicine + телемедицина + Telesalud + Telemedicina + التطبيب عن بعد + الصحة عن بعد | English + Russian + Spanish + Arabic                               | Arabic, English                                                                 |
| <b>Ukraine</b>            | Telehealth + Telemedicine + Telemedizin + Télémédecine + Telesalud + Телемедицина + Telemedicina    | Ukranian + Russian + English + German + French + Spanish           | Ukranian, Russian                                                               |
| <b>Kazakhstan</b>         | Telehealth + Telemedicine + Telemedizin + Télémédecine + Telesalud + Телемедицина + Telemedicina    | Kazakh + Russian + English + German + French + Spanish             | Kazakh, Russian                                                                 |
| <b>Oman</b>               | Telehealth + Telemedicine + телемедицина + Telesalud + Telemedicina + التطبيب عن بعد + الصحة عن بعد | English + Russian + Spanish + Arabic                               | Arabic                                                                          |
| <b>Philippines</b>        | Telehealth + Telemedicine + Telemedizin + Télémédecine + Telesalud + Телемедицина + Telemedicina    | Filipino + English + German + Spanish + Russian + French + Italian | English and Filipino Official, Spanish common                                   |
| <b>Singapore</b>          | Telemedicine + Telehealth + 远程医疗                                                                    | English + Chinese + Malay + Hindi                                  | English Lingua Franca, Malay, Hindi and Chinese common, Malay official language |
| <b>Portugal</b>           | Telehealth + Telemedicine + Telessaúde + Télémédecine + Telesalud + Télésanté + Telemedicina        | Portugese + English + French + Spanish                             | Portugese, English, French and Spanish Common                                   |
| <b>Panama</b>             | Telehealth + Telemedicine + Telemedizin + Télémédecine + Telesalud + Telessaúde + Telemedicina      | English + German + Portugese + Spanish + French + italian          | Spanish                                                                         |
| <b>Bolivia</b>            | Telehealth + Telemedicine + Telemedizin + Télémédecine + Telesalud + Telessaúde + Telemedicina      | English + German + Portugese + Spanish + French + italian          | Spanish                                                                         |
| <b>Dominican Republic</b> | Telehealth + Telemedicine + Telemedizin + Télémédecine + Telesalud + Telessaúde + Telemedicina      | English + German + Portugese + Spanish + French + italian          | Spanish                                                                         |
| <b>Poland</b>             | Telehealth + Telemedicine + Telemedizin + telemedycyna + teledrowie + Телемедицина + Telemedicina   | Polish + English + Russian + German + Spanish                      | Polish Official, English, Russian and German Common                             |
| <b>Afghanistan</b>        | Telehealth + Telemedicine + تليميديسين + پزشکی از راه دور                                           | Pashto + Persian + English                                         | Dari and Pashto & Persian                                                       |
| <b>Switzerland</b>        | Telehealth + Telemedicine + Telemedizin + Télémédecine + Telesalud + Telessaúde + Telemedicina      | English + German + Spanish + Russian + French + Italian            | German, French, Italian and Romansh                                             |

|                |                                                                                                        |                                                    |                                                 |
|----------------|--------------------------------------------------------------------------------------------------------|----------------------------------------------------|-------------------------------------------------|
| <b>Israel</b>  | Telehealth + Telemedicine + טלרפואה + Telesalud + Telemedicina +<br>التطبيب عن بعد + الصحة عن بعد      | English + Hebrew + Arabic + Spanish                | Hebrew + Arabic                                 |
| <b>Bahrain</b> | Telehealth + Telemedicine + телемедицина + Telesalud +<br>Telemedicina + التطبيب عن بعد + الصحة عن بعد | English + Russian + Spanish + Arabic               | Arabic Official, English Widely Spoken          |
| <b>Nigeria</b> | Telehealth (Topic)                                                                                     |                                                    | Official Language: English                      |
| <b>Romania</b> | Telehealth + Telemedicine + Telemedizin + Télémédecine +<br>Telesalud + Телемедицина + Telemedicina    | Romanian + English + German + Russian<br>+ Spanish | Romanian                                        |
| <b>Armenia</b> | Telehealth + Telemedicine + հեռաբժշկություն + τηλεϊατρική +<br>Telesalud + Телемедицина + Telemedicina | Armenian + English + Greek + Spanish +<br>Russian  | Armenian Official, Russian and Greek<br>Popular |

**Supplementary Table 2: Additional RSV- and Telehealth-related parameters for top 50 countries most affected by COVID-19**

|    | <b>Country</b>      | <b>Mean Pre-covid RSV levels</b> | <b>Mean Post-covid RSV levels</b> | <b>Ratio (Increase)</b> | <b>GDP-Per-Capita (\$USD)</b> | <b>Literacy rates</b> |
|----|---------------------|----------------------------------|-----------------------------------|-------------------------|-------------------------------|-----------------------|
| 1  | <b>USA</b>          | 5.44                             | 33.04                             | 6.08                    | 65,280.7                      | 99                    |
| 2  | <b>Brazil</b>       | 7.15                             | 41.22                             | 5.76                    | 8,717.2                       | 93                    |
| 3  | <b>India</b>        | 6.26                             | 30.72                             | 4.91                    | 2,104.1                       | 74                    |
| 4  | <b>Russia</b>       | 21.03                            | 58.37                             | 2.78                    | 11,585                        | 99                    |
| 5  | <b>Peru</b>         | 6.09                             | 29.90                             | 4.91                    | 6,977.7                       | 94                    |
| 6  | <b>Chile</b>        | 3.94                             | 35.07                             | 8.89                    | 14,896.5                      | 96                    |
| 7  | <b>UK</b>           | 9.92                             | 20.90                             | 2.11                    | 42,300.3                      | 99                    |
| 8  | <b>Mexico</b>       | 14.07                            | 20.08                             | 1.43                    | 9,863.1                       | 95                    |
| 9  | <b>Spain</b>        | 13.01                            | 34.62                             | 2.66                    | 29,613.7                      | 98                    |
| 10 | <b>Iran</b>         | 10.69                            | 10.93                             | 1.02                    | 5,520.3                       | 86                    |
| 11 | <b>Italy</b>        | 11.33                            | 39.74                             | 3.51                    | 5,995.1                       | 99                    |
| 12 | <b>Pakistan</b>     | 0.84                             | 15.86                             | 18.82                   | 1,284.7                       | 59                    |
| 13 | <b>Saudi Arabia</b> | 3.11                             | 17.55                             | 5.64                    | 23,139.8                      | 95                    |
| 14 | <b>Turkey</b>       | 1.60                             | 14.42                             | 9.01                    | 9,042.5                       | 96                    |
| 15 | <b>South Africa</b> | 3.50                             | 15.24                             | 4.36                    | 6,001.4                       | 87                    |
| 16 | <b>Germany</b>      | 21.05                            | 34.17                             | 1.62                    | 46,258.9                      | 99                    |
| 17 | <b>Bangladesh</b>   | 2.20                             | 21.53                             | 9.80                    | 1,855.7                       | 74                    |
| 18 | <b>France</b>       | 13.33                            | 24.44                             | 1.83                    | 40,493.9                      | 99                    |
| 19 | <b>Colombia</b>     | 12.81                            | 39.52                             | 3.09                    | 6,432.4                       | 95                    |
| 20 | <b>Canada</b>       | 9.17                             | 25.00                             | 2.73                    | 46,194.7                      | 99                    |
| 21 | <b>Qatar</b>        | 4.07                             | 11.42                             | 2.81                    | 64,781.7                      | 93                    |
| 22 | <b>China</b>        | 18.6                             | 58.1                              | 3.13                    | 10,261.7                      | 97                    |

|    |                           |       |       |       |          |    |
|----|---------------------------|-------|-------|-------|----------|----|
| 23 | <b>Argentina</b>          | 2.24  | 18.79 | 8.40  | 10,006.1 | 99 |
| 24 | <b>Egypt</b>              | 5.02  | 12.96 | 2.58  | 3,020    | 71 |
| 25 | <b>Sweden</b>             | 4.01  | 6.70  | 1.67  | 51,610.1 | 99 |
| 26 | <b>Indonesia</b>          | 7.66  | 22.46 | 2.93  | 4,135.6  | 96 |
| 27 | <b>Belarus**</b>          | 0     | 2.23  | NIL   | 6,663.3  | 99 |
| 28 | <b>Ecuador</b>            | 6.04  | 18.93 | 3.13  | 6,183.8  | 93 |
| 29 | <b>Iraq</b>               | 0     | 0     | NIL   | 5,955.1  | 86 |
| 30 | <b>Belgium</b>            | 2.77  | 6.63  | 2.39  | 46,116.7 | 99 |
| 31 | <b>UAE</b>                | 11.35 | 35.21 | 3.10  | 43,103.3 | 93 |
| 32 | <b>Netherlands</b>        | 8.27  | 18.69 | 2.26  | 52,447.8 | 99 |
| 33 | <b>Kuwait</b>             | 0     | 0     | NIL   | 32,032   | 96 |
| 34 | <b>Ukraine</b>            | 7.82  | 22.46 | 2.87  | 3,659    | 99 |
| 35 | <b>Kazakhstan</b>         | 2.78  | 5.52  | 1.98  | 9,731.1  | 99 |
| 36 | <b>Oman</b>               | 0     | 0     | NIL   | 15,474   | 96 |
| 37 | <b>Philippines</b>        | 9.71  | 37.63 | 3.87  | 3,485.1  | 98 |
| 38 | <b>Singapore</b>          | 13.22 | 26.54 | 2.01  | 65,233.3 | 97 |
| 39 | <b>Portugal</b>           | 11.14 | 14.45 | 1.30  | 23,145   | 96 |
| 40 | <b>Panama*</b>            | 2.42  | 6.20  | 2.56* | 15,731   | 95 |
| 41 | <b>Bolivia*</b>           | 3.24  | 8.78  | 2.71* | 3,552.1  | 92 |
| 42 | <b>Dominican Republic</b> | 1.30  | 11.51 | 8.85  | 8,282.1  | 94 |
| 43 | <b>Poland</b>             | 14.63 | 36.35 | 2.48  | 15,595   | 99 |
| 44 | <b>Afghanistan</b>        | 0     | 0     | NIL   | 502.1    | 43 |
| 45 | <b>Switzerland</b>        | 15.85 | 17.65 | 1.11  | 81,993.7 | 99 |
| 46 | <b>Israel</b>             | 5.88  | 13.89 | 2.36  | 43,641.4 | 92 |

|                   |                |      |       |           |                 |              |
|-------------------|----------------|------|-------|-----------|-----------------|--------------|
| 47                | <b>Bahrain</b> | 0    | 0     | NIL       | 23,504          | 97           |
| 48                | <b>Nigeria</b> | 7.91 | 18.60 | 2.35      | 2,229.9         | 62           |
| 49                | <b>Armenia</b> | 3.47 | 15.03 | 4.33      | 46,22.7         | 99           |
| 50                | <b>Romania</b> | 0    | 0     | NIL       | 12,919.5        | 99           |
| <b>Mean (SD):</b> |                |      |       | 4.07±3.23 | 21,063 ± 21,011 | 92.22 ± 11.6 |

\*Despite have RSV increases of (ratios) > 2.5 times, Panama and Bolivia were still considered to have experienced “smaller, subtler” changes in RSVs, due to the low RSV levels pre- and post-COVID (<10).

\*\*Belarus was also considered to have “no observable trends” in RSVs due to pre-COVID RSV levels of 0.

## Supplementary Figure 1: Worldwide Time-Trends for Telehealth-RSVs (blue) against daily COVID-19 deaths in top 50 countries

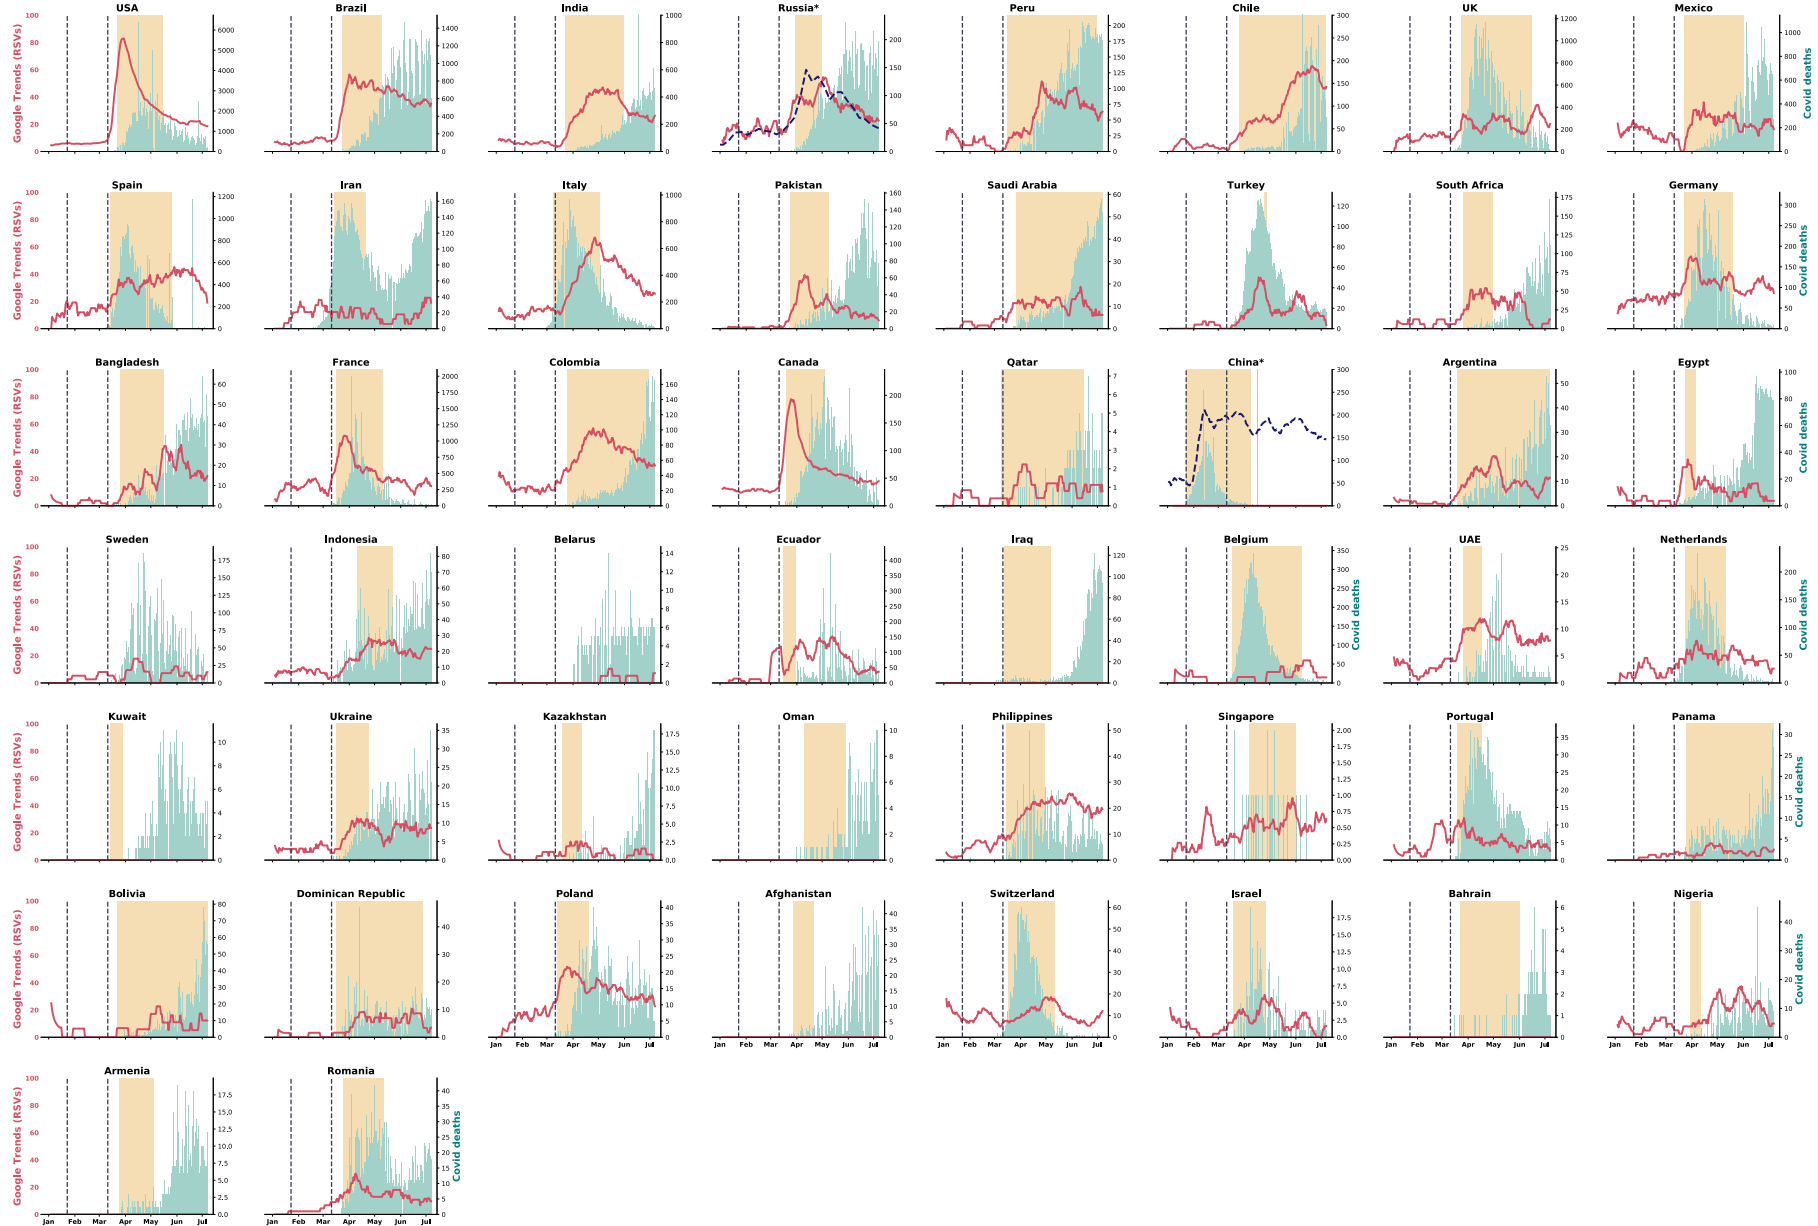

Countries arranged from left to right in order of total number of reported COVID-19 cases. x-axis represents time in individual days from 01/01/20 – 07/07/20. Left and right y-axes represent GT-RSVs and COVID-19 case numbers respectively. Red trendlines represent telehealth-related RSVs as measured by Google trends. Vertical bars in teal represent daily COVID-19 cases. Black vertical lines represent 2 key dates: the start of the Hubei Province lockdown (23<sup>rd</sup> January, 2020) and the declaration of COVID-19 as a Pandemic by the WHO (11<sup>th</sup> March 2020). Shaded yellow regions represent country-specific lockdown or restriction periods.

\*Blue trendlines for China and Russia represent telehealth-related RSVs as measured by Baidu and Yandex respectively



**Supplementary Figure 2: Relationship between Telehealth RSVs vs Literacy rates across the 50 most COVID-19 affected countries\*.**

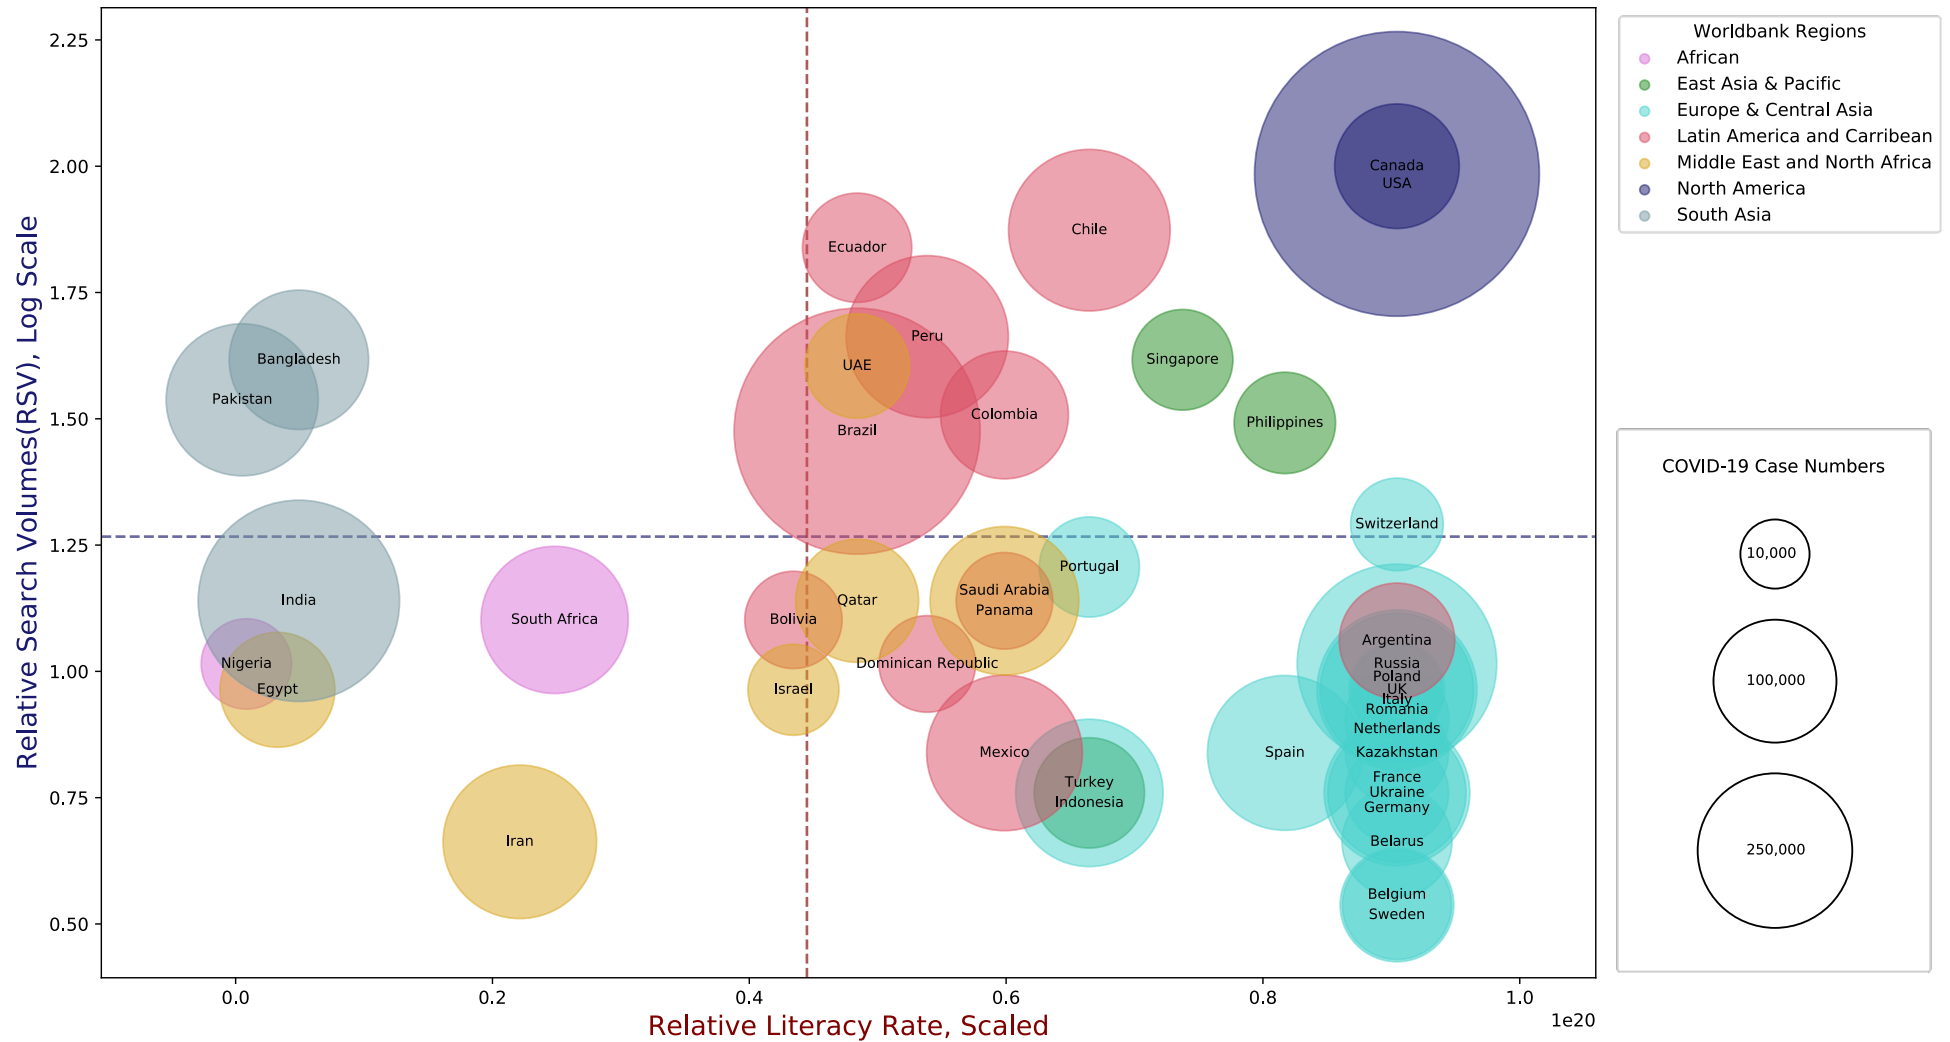

Each country is represented as a data-point, and color coded according to world-bank region. The size of each plot reflects the accumulated total COVID-19 case numbers (as of 7<sup>th</sup> July 2020). x-axis represents the ICT Development Index (ID), while the y-axis represents the scaled literacy rate for each country. Vertical and horizontal dashed lines represent the mean values for the x- and y-axes respectively.

\*Countries with RSV=0 were not included in the plot.

**Supplementary Figure 3: Relationship between Telehealth RSVs vs GDP-per-capita (\$USD) across the 50 most COVID-19 affected countries\*.**

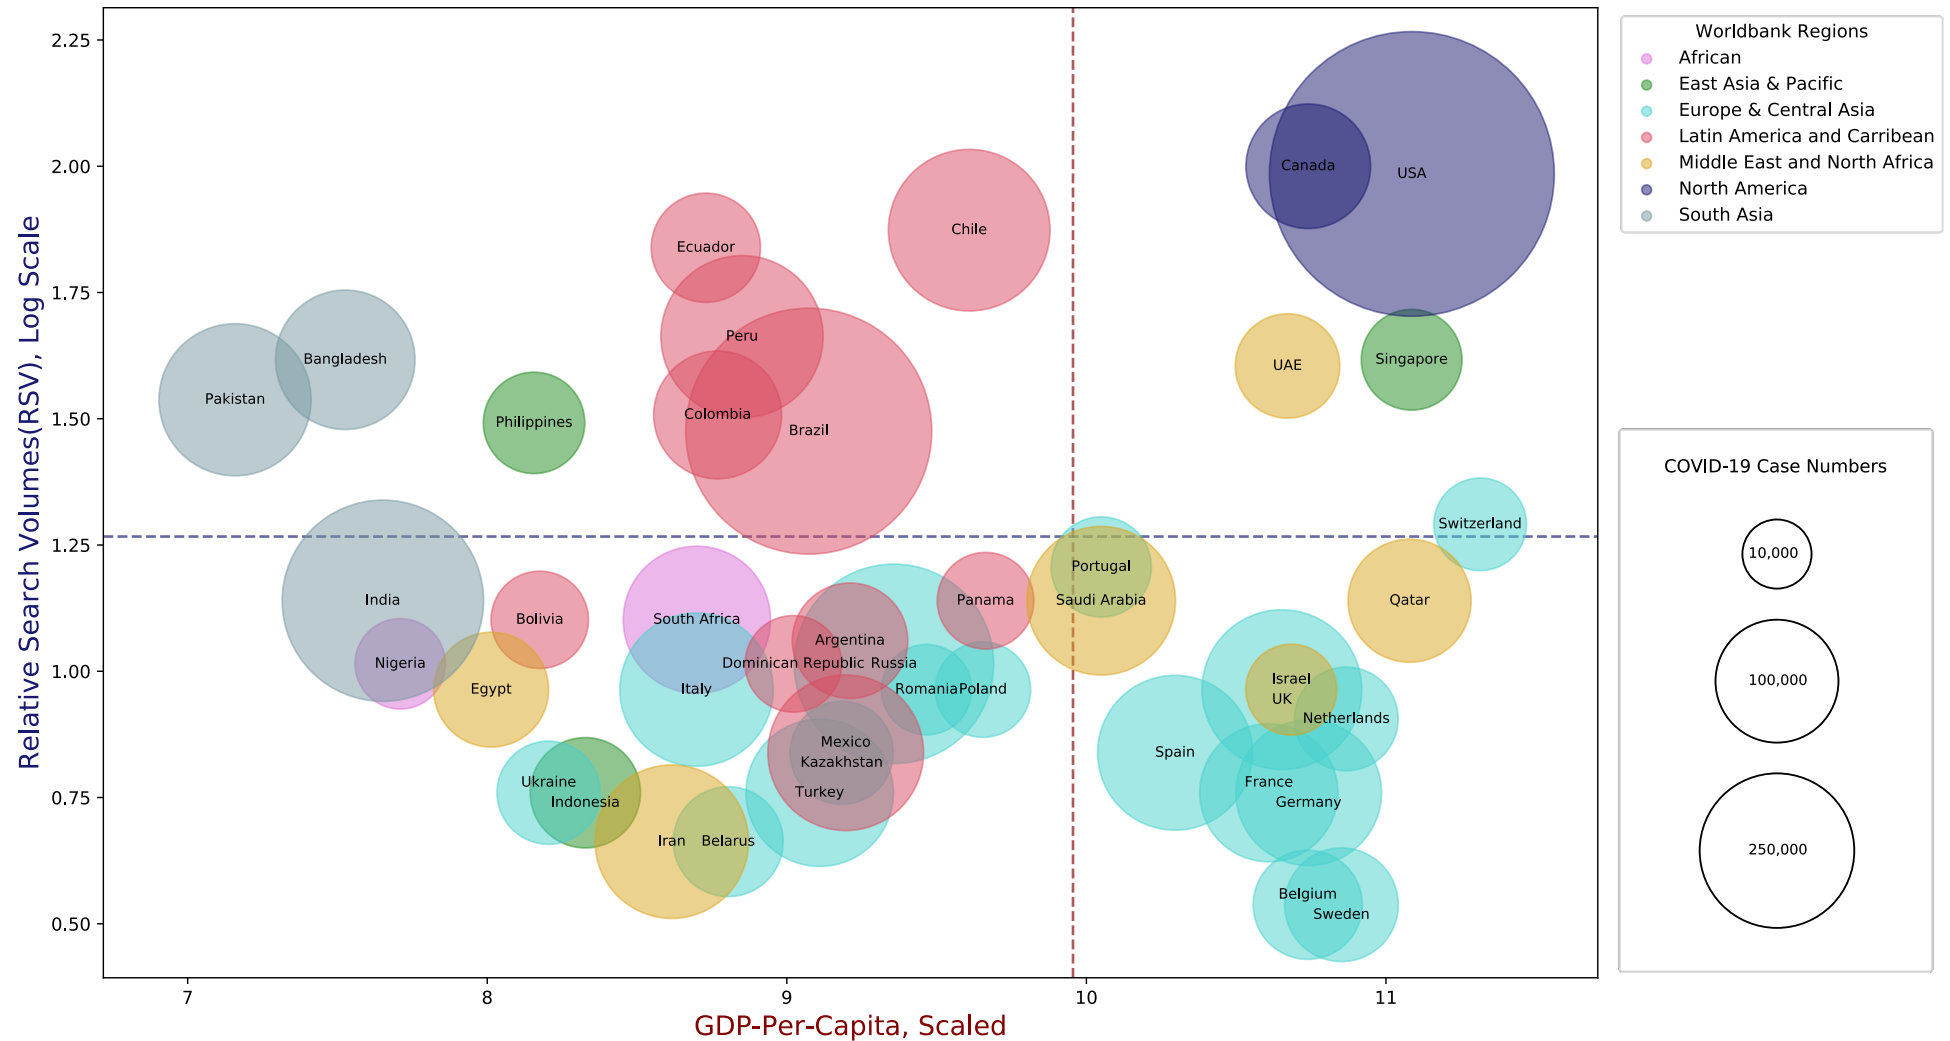

Each country is represented as a data-point, and color coded according to world-bank region. The size of each plot reflects the accumulated total COVID-19 case numbers (as of 7<sup>th</sup> July 2020). x-axis represents the ICT Development Index (ID), while the y-axis represents the (log) scaled GDP-per-capita for each country. Vertical and horizontal dashed lines represent the mean values for the x- and y-axes respectively.

\*Countries with RSV=0 were not included in the plot.

**Supplementary Figure 4: Relationship between Telehealth RSVs vs ICT Adoption index across the 50 most COVID-19 affected countries\*.**

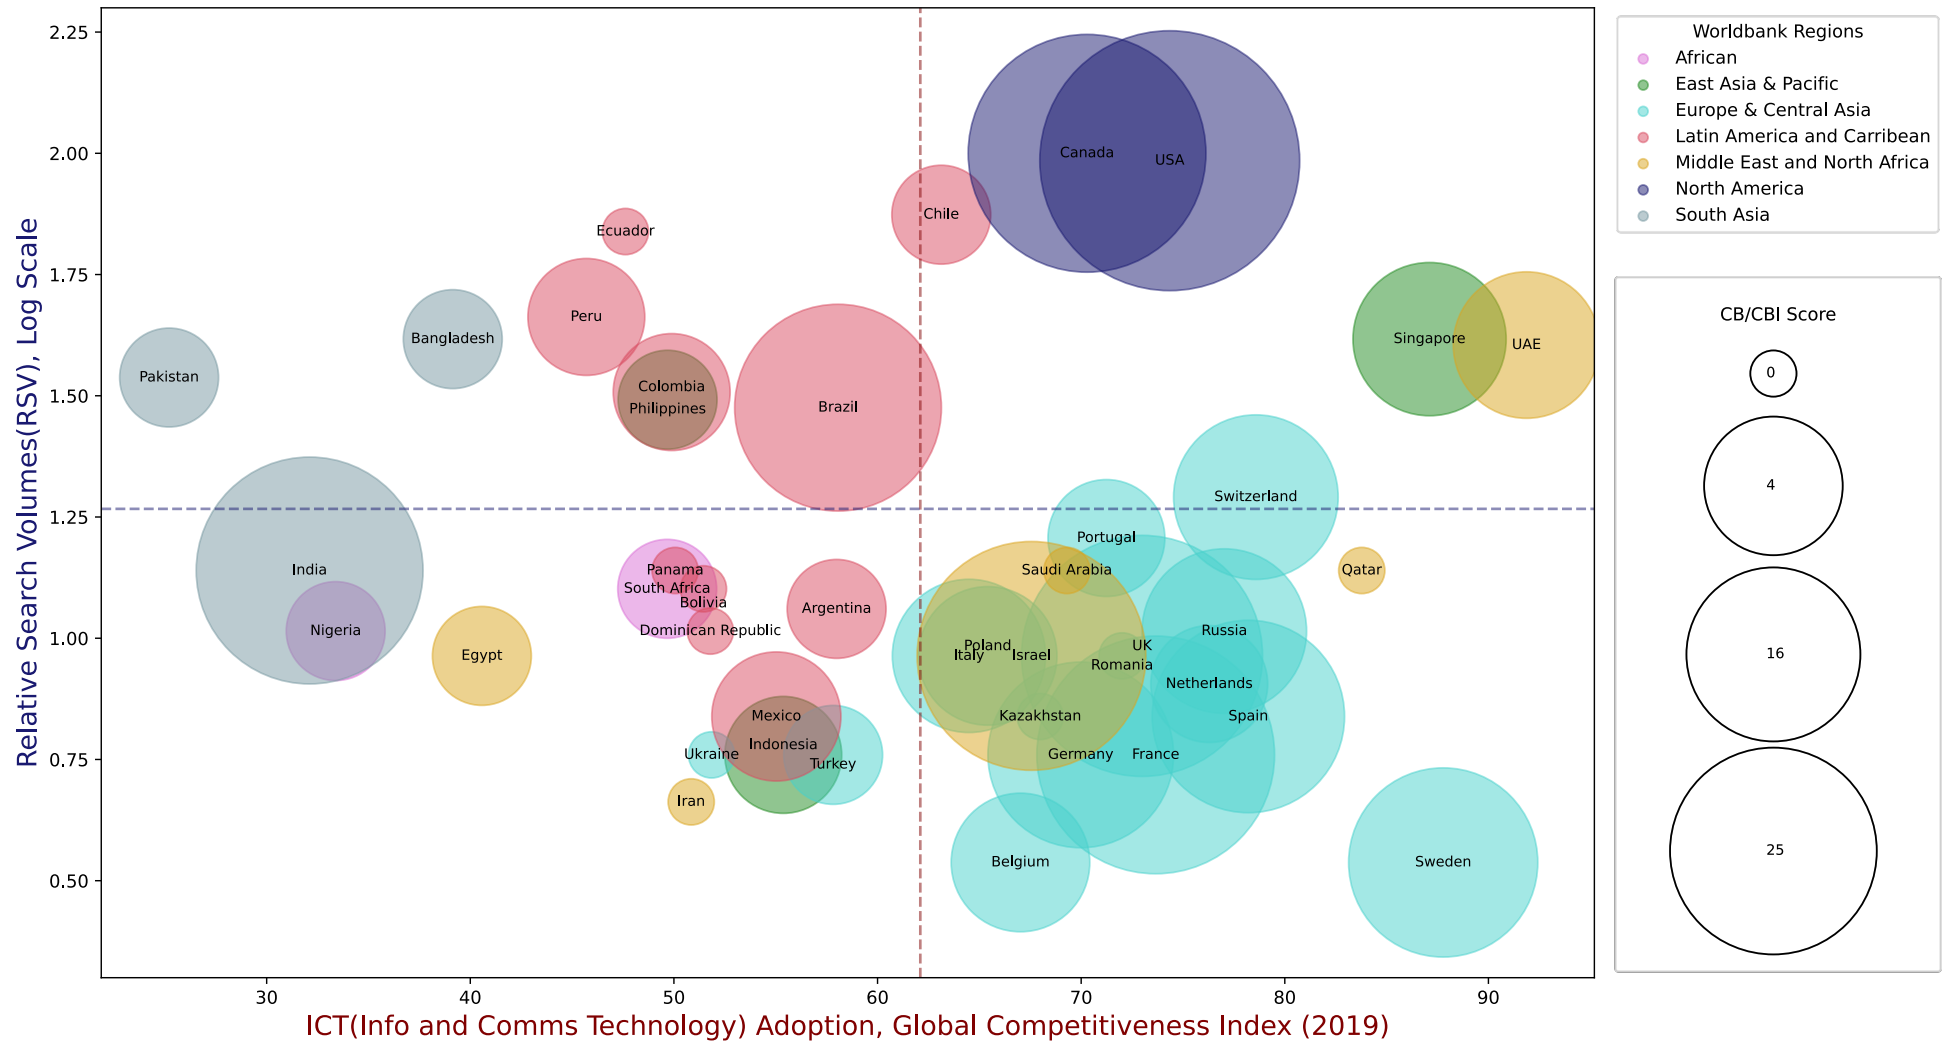

Each country is represented as a data-point, and color coded according to world-bank region. The size of each plot reflects the CB/CBI score (as a proxy for existing telehealth capacity). x-axis represents the ICT Adoption index, while the y-axis represents the scaled (log) RSVs for each country. Vertical and horizontal dashed lines represent the mean values for the x- and y-axes respectively.

\*Countries with RSV=0 were not included in the plot.
