# Supplementary material for: Telehealth Demand Trends During the COVID-19 Pandemic in the Top 50 Most Affected Countries: Infodemiological Evaluation
Source: PubMed Central journal article supplement (PMC7899203; doi:10.2196/24445), 2021-02-19

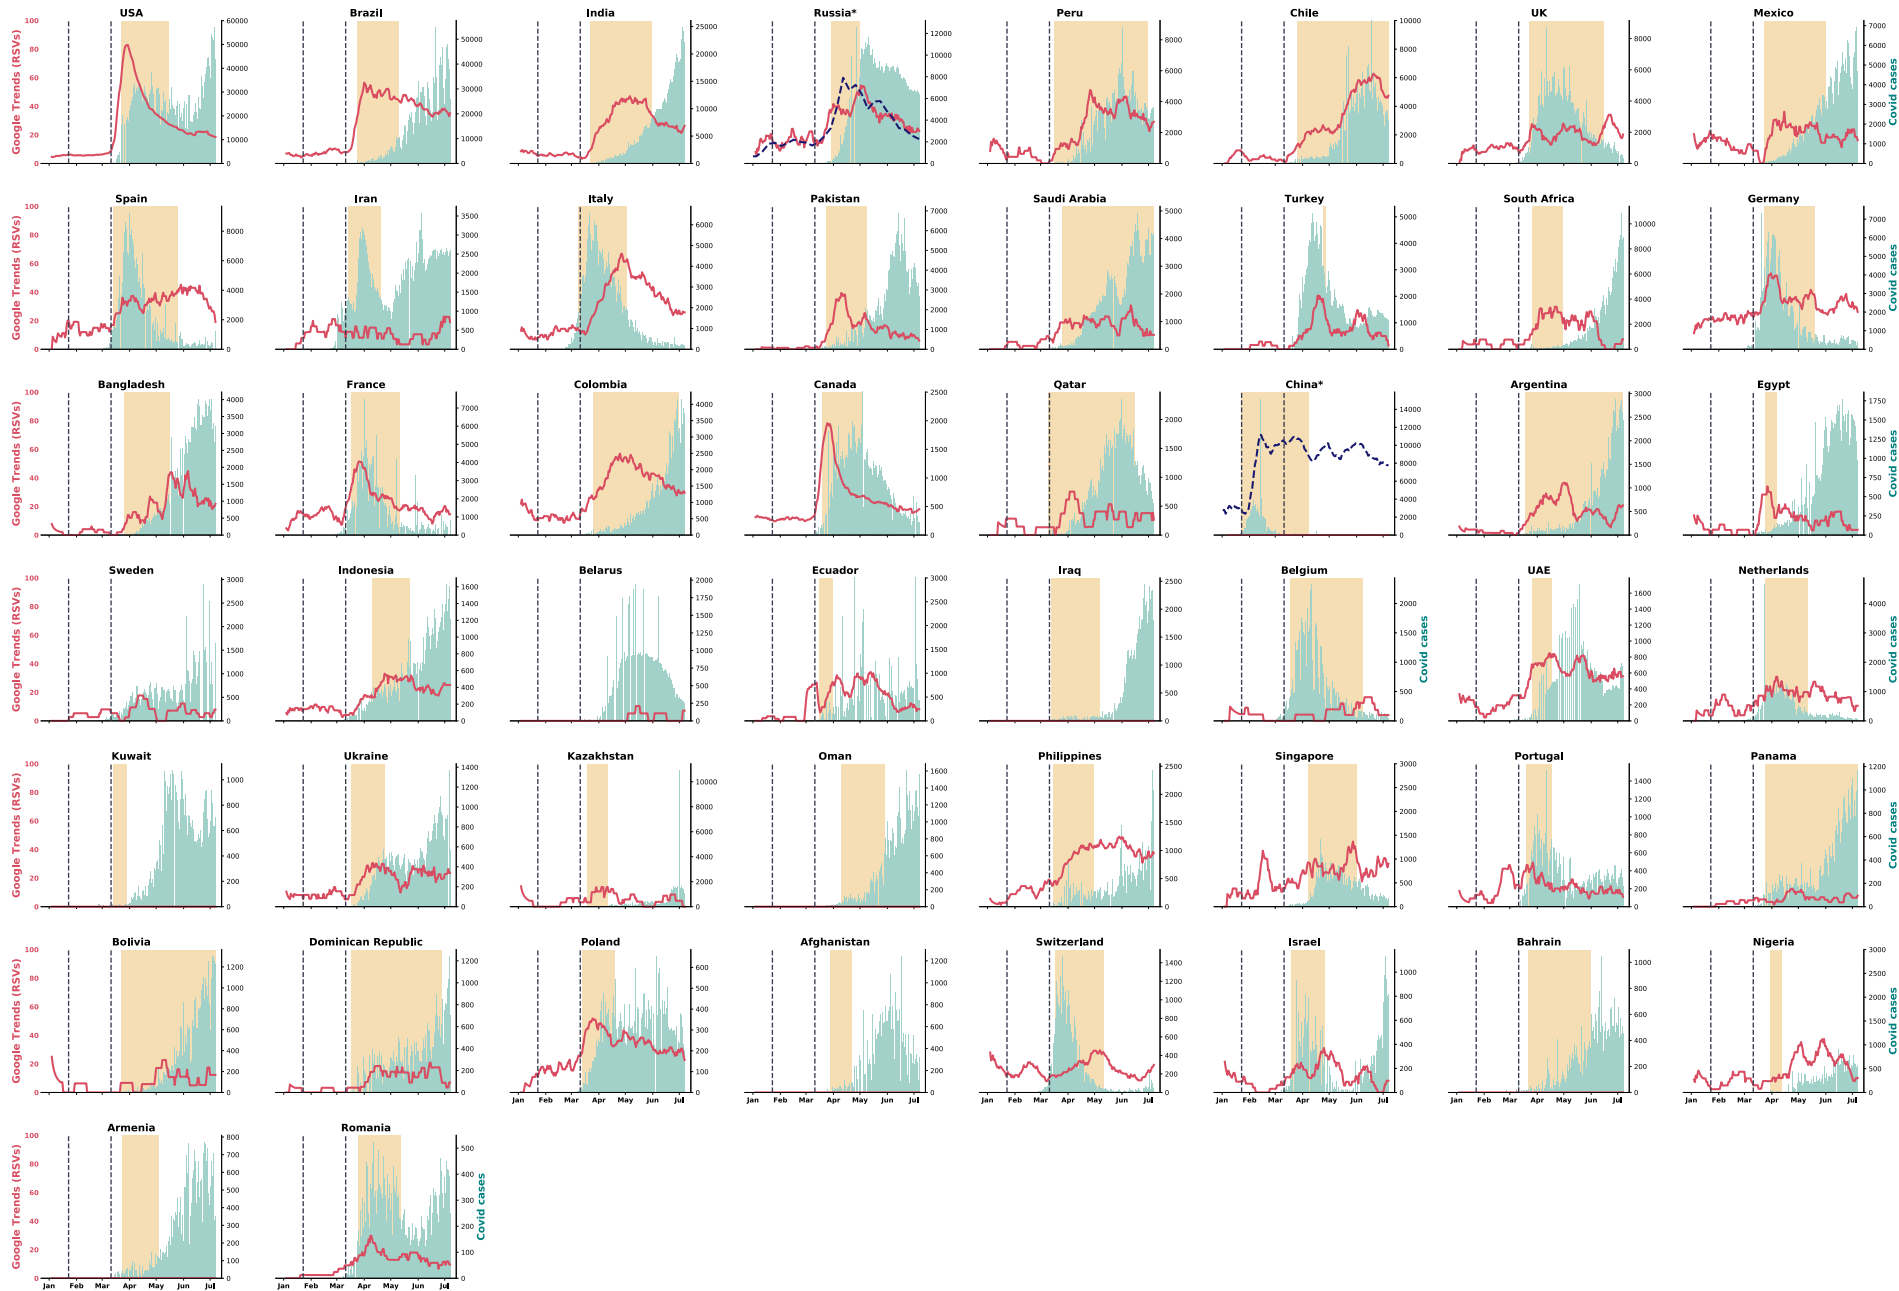

Supplement: publichealth_v7i2e24445_app2.pdf [file publichealth_v7i2e24445_app2.pdf]
